# Supplementary material for: Bioponics—An Organic Closed-Loop Soilless Cultivation System: Yields and Characteristics Compared to Hydroponics and Soil Cultivation
Source: MDPI journal article supplement (doi:10.3390/agronomy13061436), 2023-05-23
Supplement: s1 [file s1]

## SUPPLEMENTARY INFORMATION

# Bioponics—An Organic Closed-Loop Soilless Cultivation System: Yields and Characteristics Compared to Hydroponics and Soil Cultivation

Florentina Gartmann <sup>1</sup>, Julian Hügly <sup>1</sup>, Nikita Krähenbühl <sup>1</sup>, Nadine Brinkmann <sup>2</sup>, Zala Schmutz <sup>1,\*</sup>, Theo H. M. Smits <sup>3</sup> and Ranka Junge <sup>1</sup>

<sup>1</sup> Ecological Engineering Centre, Institute of Natural Resource Sciences, Zurich University of Applied Sciences, 8820 Wädenswil, Switzerland; florentina.gartmann@zhaw.ch (F.G.); julian.huegly@bluewin.ch (J.H.); nikita.kraehenbuehl@zhaw.ch (N.K.); ranka.junge2@zhaw.ch (R.J.)

<sup>2</sup> MycoSolutions AG, 9014 St. Gallen, Switzerland; nadine.brinkmann@mycosolutions.ch

<sup>3</sup> Environmental Genomics and Systems Biology Research Group, Institute of Natural Resource Sciences, Zurich University of Applied Sciences, 8820 Wädenswil, Switzerland; theo.smits@zhaw.ch

\* Correspondence: zala.schmutz@zhaw.ch

### *Supplementary methods*

#### **Nutrient solution analysis**

#### **Consumer test**

### *Supplementary tables*

**Table S1.** Start and end date of each trial.

**Table S2.** Commercially available mineral nutrients used for HP nutrient solution.

**Table S3.** Instrument parameters used for ion chromatography (IC) on the 930 Compact IC Flex.

**Table S4.** Iron concentration in nutrient solution reported as MEAN  $\pm$  SD (n = 66). Significant differences were obtained between cultivation systems (one-way ANOVA), and located using a Tukey's range test ( $\alpha$  = 5%).

**Table S5.** Chlorophyll- and flavonoid content and nitrogen balance index (NBI) of lettuce in bioponics (BP) and hydroponics (HP).

**Table S6.** Nitrate content in lettuce leaves fresh weight (ZHAW) in bioponics (BP), hydroponics (HP), and soil (SO) cultivation.

**Table S7.** Comparison of different nitrate, chlorophyll, and NBI measurement methods (Trial C)

**Table S8.** UV-C dose applied to the nutrient solution in bioponics (BP) and hydroponics (HP).

**Table S9.** Presence or absence of *T. atrobrunneum* strain T720 in seedling production substrate and bioponics (BP), hydroponics (HP), and soil (SO) cultivation.

**Table S10.** Overview consumer test (acceptance test) of lettuce grown in bioponics (BP), hydroponics (HP), and soil (SO) cultivation.

### *Supplementary figures*

**Figure S1.** Air temperature, rel. humidity and global radiation in the foliar greenhouse.

**Figure S2.** Development of plant growth over time in bioponics (BP), hydroponics (HP), and soil (SO) cultivation.

**Figure S3.** Development of plant health over time in bioponics (BP), hydroponics (HP), and soil (SO) cultivation.

**Figure S4.** Comparisons of water chemistry, plant growth and plant leaf sap regarding UV-C treatment and *T. atroviridulum* application in biaponics (BP), hydroponics (HP), and soil (SO) cultivation and treatments.

**Figure S5.** Transmission of the nutrient solution in biaponics (BP) and hydroponics (HP).Supplementary methods

#### Nutrient solution analysis

Total organic carbon (TOC) was measured as non-purgeable organic carbon (NPOC), according to ASTM D7573 and total nitrogen (TN) according to DIN EN 12260 with a TOC-LCSH analyser equipped with a TNM-L unit (Shimadzu, Kyoto, Japan). The samples for TOC measurements were automatically acidified with HCl to pH < 3 and sparged with purified air to remove inorganic carbon. Purgeable organic carbon (POC) may also be lost during this sample treatment.

The  $\text{NO}_2^-$ ,  $\text{NO}_3^-$ ,  $\text{SO}_4^{2-}$ ,  $\text{Cl}^-$ ,  $\text{PO}_4^{3-}$ ,  $\text{NH}_4^+$ ,  $\text{Na}^+$ ,  $\text{K}^+$ ,  $\text{Ca}^{2+}$ ,  $\text{Mg}^{2+}$  were determined by ion chromatography (IC) with specific settings (supplementary file: Table S2). The preparation of the eluents, the dilution of the calibration standards (SINGLE ELEMENT IC-Standard-Solutions 1000 mg l<sup>-1</sup>, Carl Roth GmbH, Karlsruhe, Germany) and individual samples was done with ultrapure water. Additionally, a biogas digestate concentrate sample was analyzed by IC to measure the nutrient input to BP systems.

Iron and manganese in nutrient solution were determined by Inductively coupled plasma - optical emission spectrometry (ICP-OES). The dilution of the calibration standards (standards for ICP 1000 mg l<sup>-1</sup>, Merck, Buchs, CH) and of individual samples was done with ultrapure water.

#### Consumer test

A consumer test was carried out to get an idea of how the lettuces from the different cultivation systems are rated by consumers. The 47 volunteer participants were 68% female and 32% male, 28% were 20-29 years old, 32% 30-59 years old and 30% 60-69 years old. 30% reported consuming lettuce daily, 62% several times a week and 9% once a week. The test group was thus not representative for the demographic variation in the population. When buying lettuce, 55% pay attention to the method of cultivation and for 34% of the participants lettuce from sustainable production is important and for 45% even very important. The consumer test showed no significant differences, and due to the insufficient sample size, only trends can be derived. The acceptance of the BP lettuces seemed to be like the ones grown in HP or SO (supplementary file: Table S9). Participants rated all three lettuces as equally popular overall. The popularity in terms of appearance, taste, texture was about the same for the HP and SO lettuces, while the BP lettuces scored slightly lower. In terms of bitterness, the lettuces were also the same, although some testers stated 'just right' for the BP variant. Lettuces from SO tended to be a little too weak in lettuce flavour. In terms of crispness, HP and SO tended to be too crunchy, while BP's lettuces were too delicate. While BP and SO tend to be too less juicy, lettuces from HP were 'just right'.

## Supplementary tables

**Table S1.** Start and end date of each trial.

|                | Start date                   | End date                       |
|----------------|------------------------------|--------------------------------|
| <b>Trial A</b> | June 15 <sup>th</sup> 2020   | July 10 <sup>th</sup> 2020     |
| <b>Trial B</b> | July 13 <sup>th</sup> 2020   | August 7 <sup>th</sup> 2020    |
| <b>Trial C</b> | August 10 <sup>th</sup> 2020 | September 4 <sup>th</sup> 2020 |

**Table S2.** Commercially available mineral nutrients used for HP nutrient solution.

|                                      | Composition                                              | Supplier                        |
|--------------------------------------|----------------------------------------------------------|---------------------------------|
| <b>Potassium sulfate</b>             | 51% K <sub>2</sub> O, 18% S                              | Yara International ASA, Oslo, N |
| <b>Calcium nitrate</b>               | 15.5% N, 19% Ca,                                         | Yara International ASA, Oslo, N |
| <b>Potassium monobasic phosphate</b> | 52% P <sub>2</sub> O <sub>5</sub> , 34% K <sub>2</sub> O | Yara International ASA, Oslo, N |
| <b>Micromix</b>                      | 4.2% Mn*, 0.35% Cu*, 2.45% Zn*, 0.175% Mo, 0.385% B      | Ökohum GmbH, Herrendorf, CH     |
| <b>Plantspeed Fe EDTA</b>            | 6.7% Fe*                                                 | Ökohum GmbH, Herrendorf, CH     |

\* from chelate of EDTA

**Table S3.** Instrument parameters used for ion chromatography (IC) on the 930 Compact IC Flex (Metrohm Schweiz AG, Zofingen, CH).

|                           | Anions                                                     | Cations                      |
|---------------------------|------------------------------------------------------------|------------------------------|
| <b>Eluent (isocratic)</b> | 3.2 mM sodium carbonate /<br>2 mM sodium hydrogencarbonate | 7 mM nitric acid             |
| <b>Column</b>             | Metrosep A Supp 5 – 250/4.0                                | Metrosep C6 – 250/4.0        |
| <b>Flow</b>               | 0.6 ml min <sup>-1</sup>                                   | 0.9 ml min <sup>-1</sup>     |
| <b>Detector</b>           | Conductivity detector @ 30°C                               | Conductivity detector @ 30°C |
| <b>Suppressor</b>         | on (regeneration with 0.1 M sulfuric acid)                 | off                          |

**Table S4.** Iron concentration in nutrient solution reported as MEAN ± SD (*n* = 66). Significant differences were obtained between cultivation systems regarding UV-C application (Kruskal-Wallis), and located using a Tukey's range test ( $\alpha$  = 5%).

|                                                       | BP                     | HP                     |
|-------------------------------------------------------|------------------------|------------------------|
| <b>With UV-C [mg l<sup>-1</sup>]</b>                  | 1.4 ± 1.5 <sup>a</sup> | 1.7 ± 1.6 <sup>a</sup> |
| <b>Without UV-C [mg l<sup>-1</sup>]</b>               | 4.3 ± 3.4 <sup>b</sup> | 3.3 ± 2.1 <sup>b</sup> |
| <b>With <i>Trichoderma</i> [mg l<sup>-1</sup>]</b>    | 2.8 ± 2.7              | 2.7 ± 2.0              |
| <b>Without <i>Trichoderma</i> [mg l<sup>-1</sup>]</b> | 2.8 ± 3.3              | 2.2 ± 2.0              |

**Table S5.** Chlorophyll- and flavonoid content and nitrogen balance index (NBI) of lettuce in biaponics (BP) and hydroponics (HP) reported as MEAN ± SD. Significant differences for NBI, chlorophyll, and flavonoid (Kruskal-Wallis) were obtained, and located using a Tukey's range test ( $\alpha$  = 5%). Anthocyanin contents were below detection limit.

|                                         | BP                           | HP                           | SO                         |
|-----------------------------------------|------------------------------|------------------------------|----------------------------|
| <i>n</i> =                              | 97                           | 106                          | 54                         |
| <b>NBI [-]</b>                          | 248.94 ± 169.49 <sup>c</sup> | 145.37 ± 133.10 <sup>a</sup> | 87.99 ± 50.03 <sup>b</sup> |
| <b>Chlorophyll [µg cm<sup>-2</sup>]</b> | 23.21 ± 3.76 <sup>a</sup>    | 23.13 ± 3.61 <sup>a</sup>    | 20.76 ± 3.75 <sup>b</sup>  |
| <b>Flavonoid [µg cm<sup>-2</sup>]</b>   | 0.17 ± 0.09 <sup>b</sup>     | 0.27 ± 0.09 <sup>a</sup>     | 0.31 ± 0.14 <sup>a</sup>   |

**Table S6.** Nitrate content in lettuce leaves fresh weight (ZHAW) in bioponics (BP), hydroponics (HP), and soil (SO) cultivation reported as MEAN  $\pm$  SD. Significant differences were obtained between cultivation systems (one-way ANOVA), and located using a Tukey's range test ( $\alpha = 5\%$ ).

|                                       | BP                               | HP                               | SO                               |
|---------------------------------------|----------------------------------|----------------------------------|----------------------------------|
| <i>n</i> =                            | 24                               | 24                               | 12                               |
| <b>Nitrate</b> [mg kg <sup>-1</sup> ] | 396.99 $\pm$ 274.02 <sup>b</sup> | 598.65 $\pm$ 181.63 <sup>a</sup> | 690.29 $\pm$ 132.44 <sup>a</sup> |

**Table S7.** Comparison of two nitrate (in plant sap; NovaCropControl, and extract; ZHAW), chlorophyll, and NBI measurement methods (Trial C). Significant strong positive correlations (\*) between obtained for sap of young and old leaves, sap young leaves and nitrate in extract, and sap of old leaves and nitrate in extract (*n* = 3).

|                                                                  | Correlation<br>[r-value] | Significance<br>[p-value] |
|------------------------------------------------------------------|--------------------------|---------------------------|
| NBI (Dualex) – Nitrate in sap young leaves                       | -0.56                    | 0.001                     |
| NBI (Dualex) – Nitrate in extract of mixed leaves                | -0.46                    | 0.011                     |
| NBI (Dualex) – Nitrate in sap old leaves                         | -0.50                    | 0.005                     |
| NBI (Dualex) – Chlorophyll (Dualex)                              | 0.18                     | 0.316                     |
| Nitrate in sap young leaves – Nitrate in extract of mixed leaves | 0.94                     | 2.514E-14 *               |
| Nitrate in sap young leaves – Nitrate in sap old leaves          | 0.96                     | 1.195E-16 *               |
| Nitrate in sap young leaves – Chlorophyll (Dualex)               | -0.59                    | 0.001                     |
| Nitrate in sap old leaves – Nitrate in extract of mixed leaves   | 0.91                     | 5.606E-12 *               |
| Nitrate in sap old leaves – Chlorophyll (Dualex)                 | -0.49                    | 0.006                     |
| Nitrate in extract of mixed leaves – Chlorophyll (Dualex)        | -0.50                    | 0.005                     |

**Table S8.** UV-C dose applied to the nutrient solution in bioponics (BP) and hydroponics (HP) reported as MEAN  $\pm$  SD (*n* = 8).

|                                 | UV-C dose [mW s cm <sup>-2</sup> ] |
|---------------------------------|------------------------------------|
| BP2 – UV-C                      | 56 $\pm$ 27                        |
| BP4 - <i>Trichoderma</i> & UV-C | 88 $\pm$ 83                        |
| HP1 - <i>Trichoderma</i> & UV-C | 140 $\pm$ 109                      |
| HP3 – UV-C                      | 188 $\pm$ 147                      |

**Table S9.** Presence (+) or absence (-) of *T. atrobrunneum* strain T720 in seedling production substrate and bioponics (BP), hydroponics (HP), and soil (SO) cultivation. Systems, in which *Trichoderma* was applied, are highlighted dark **bold**.

| Date                                                     | Trial A |        |        | Trial B |        |        | Trial C |        |        |
|----------------------------------------------------------|---------|--------|--------|---------|--------|--------|---------|--------|--------|
|                                                          | 25.06.  | 01.07. | 09.07. | 18.07.  | 29.07. | 06.08. | 13.08.  | 24.08. | 03.09. |
| <b>Seedlings Trial A - <i>Trichoderma</i>; Substrate</b> | N.A.    | N.A.   | N.A.   | -       | N.A.   | N.A.   | -       | N.A.   | N.A.   |
| Seedlings Trial A Substrate                              | N.A.    | N.A.   | N.A.   | -       | N.A.   | N.A.   | -       | N.A.   | N.A.   |
| <b>Seedlings Trial A - <i>Trichoderma</i>; Rockwool</b>  | +       | N.A.   | N.A.   | +       | N.A.   | N.A.   | +       | N.A.   | N.A.   |
| Seedlings Trial A Rockwool                               | -       | N.A.   | N.A.   | -       | N.A.   | N.A.   | -       | N.A.   | N.A.   |
| Seedling substrate before-use                            | -       | N.A.   | N.A.   | N.A.    | N.A.   | N.A.   | N.A.    | N.A.   | N.A.   |
| Cultivation substrate before-use                         | -       | N.A.   | N.A.   | N.A.    | N.A.   | N.A.   | N.A.    | N.A.   | +      |
| BP1                                                      | -       | -      | -      | -       | -      | -      | -       | -      | -      |
| BP2 – UV-C                                               | -       | -      | -      | -       | -      | -      | -       | -      | -      |
| <b>BP3 - <i>Trichoderma</i></b>                          | +       | +      | +      | -       | -      | -      | -       | +      | +      |
| <b>BP4 - <i>Trichoderma</i> &amp; UV-C</b>               | -       | +      | +      | -       | +      | -      | +       | +      | +      |
| <b>HP1 - <i>Trichoderma</i> &amp; UV-C</b>               | +       | -      | -      | -       | -      | -      | -       | -      | +      |
| <b>HP2 - <i>Trichoderma</i></b>                          | +       | -      | +      | +       | -      | -      | +       | -      | +      |
| HP3 – UV-C                                               | -       | -      | -      | -       | -      | -      | -       | -      | -      |
| HP4                                                      | -       | -      | -      | -       | -      | -      | -       | -      | -      |
| <b>SO1 - <i>Trichoderma</i>; Irrigation water</b>        | +       | +      | +      | -       | -      | +      | +       | -      | +      |
| SO2; Irrigation water                                    | -       | -      | -      | -       | -      | -      | -       | -      | -      |
| <b>SO1 - <i>Trichoderma</i>; Substrate</b>               | N.A.    | -      | +      | N.A.    | -      | -      | N.A.    | -      | -      |
| SO2 Substrate                                            | N.A.    | -      | -      | N.A.    | -      | -      | N.A.    | -      | -      |

Presence (+), absence (-) or no data available (N.A.)

**Table S10.** Overview consumer test (acceptance test) of lettuce grown in bioponics (BP), hydroponics (HP), and soil (SO) cultivation ( $n = 47$ ).

| Parameter             | BP                                                                                                      | HP   | SO   | p-value |
|-----------------------|---------------------------------------------------------------------------------------------------------|------|------|---------|
| Overall popularity    | 6.34                                                                                                    | 6.98 | 6.89 | 0.37    |
| Popularity appearance | 7.34                                                                                                    | 7.23 | 7.53 | 0.43    |
| Popularity taste      | 6.30                                                                                                    | 7.04 | 6.62 | 0.22    |
| Popularity texture    | 6.72                                                                                                    | 7.11 | 7.11 | 0.20    |
| Bitterness            | All three are perceived similarly in terms of bitterness; for BP, few consumers indicated 'just right'. |      |      |         |
| Flavour               | SO tended to be a bit too weak in lettuce flavour.                                                      |      |      |         |
| Crispness             | HP and SO tended to be too crisp.                                                                       |      |      |         |
| Delicateness          | BP polarized (too delicate), the other two 'just right'.                                                |      |      |         |
| Juiciness             | BP and SO tend to be too less juicy, HP 'just right'.                                                   |      |      |         |

# Supplementary figures

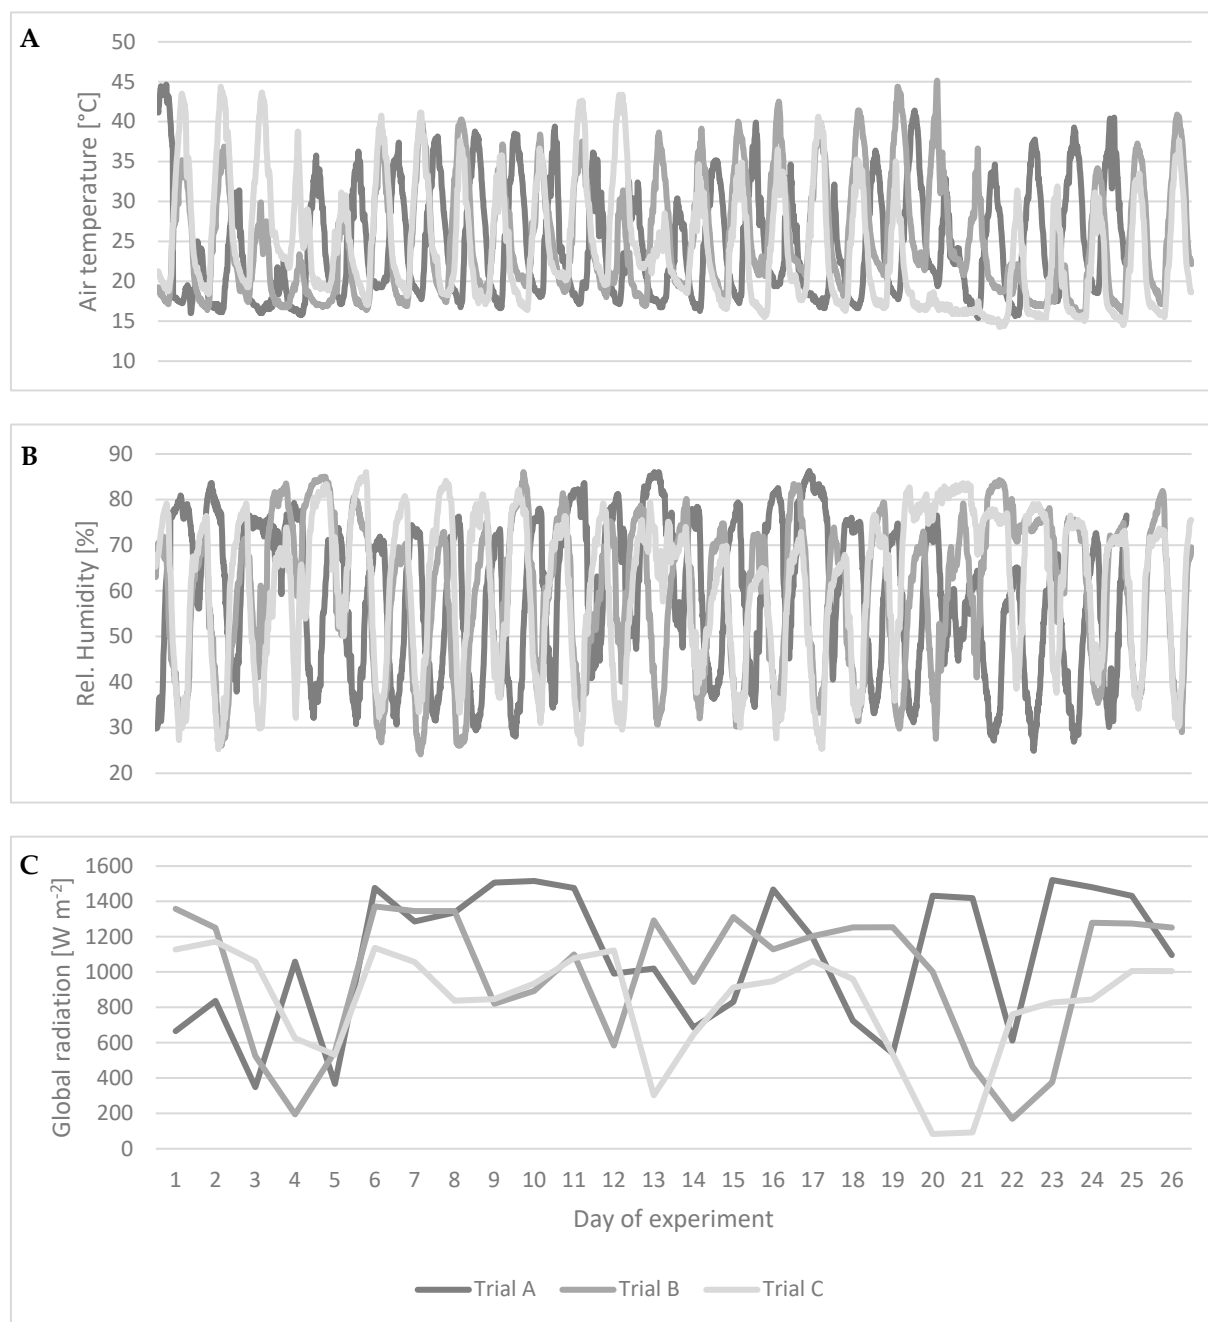

**Figure S1.** A) Air temperature, B) rel. humidity and C) global radiation in the foliar greenhouse.

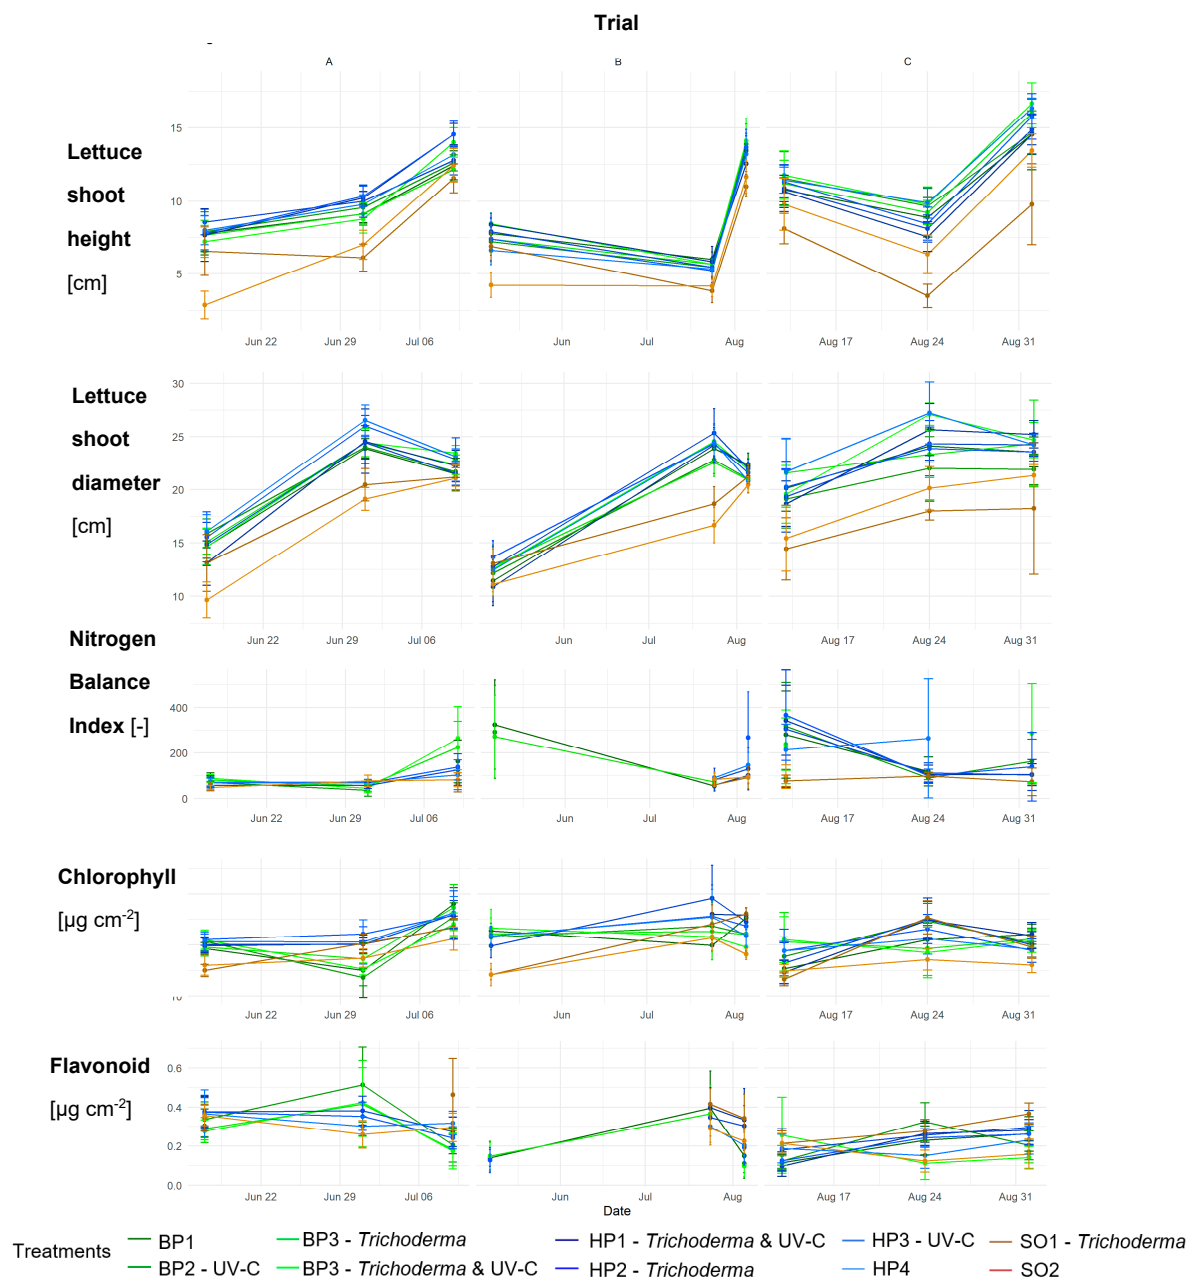

**Figure S2.** Development of plant growth (lettuce shoot height and diameter, nitrogen balance index, chlorophyll, and flavonoid content) over time in bioponics (BP), hydroponics (HP), and soil (SO) cultivation.



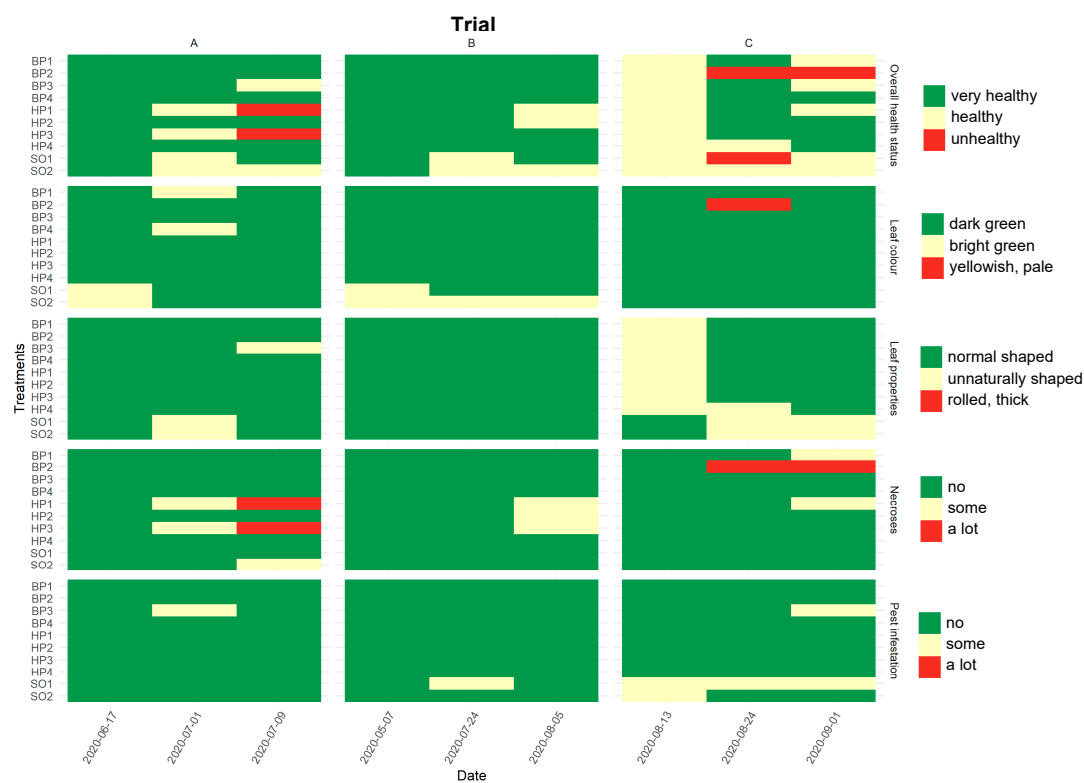

**Figure S3.** Development of plant health (overall health status, leaf color, leaf properties, necroses, pest infestation) over time in bioponics (BP), hydroponics (HP), and soil (SO) cultivation.

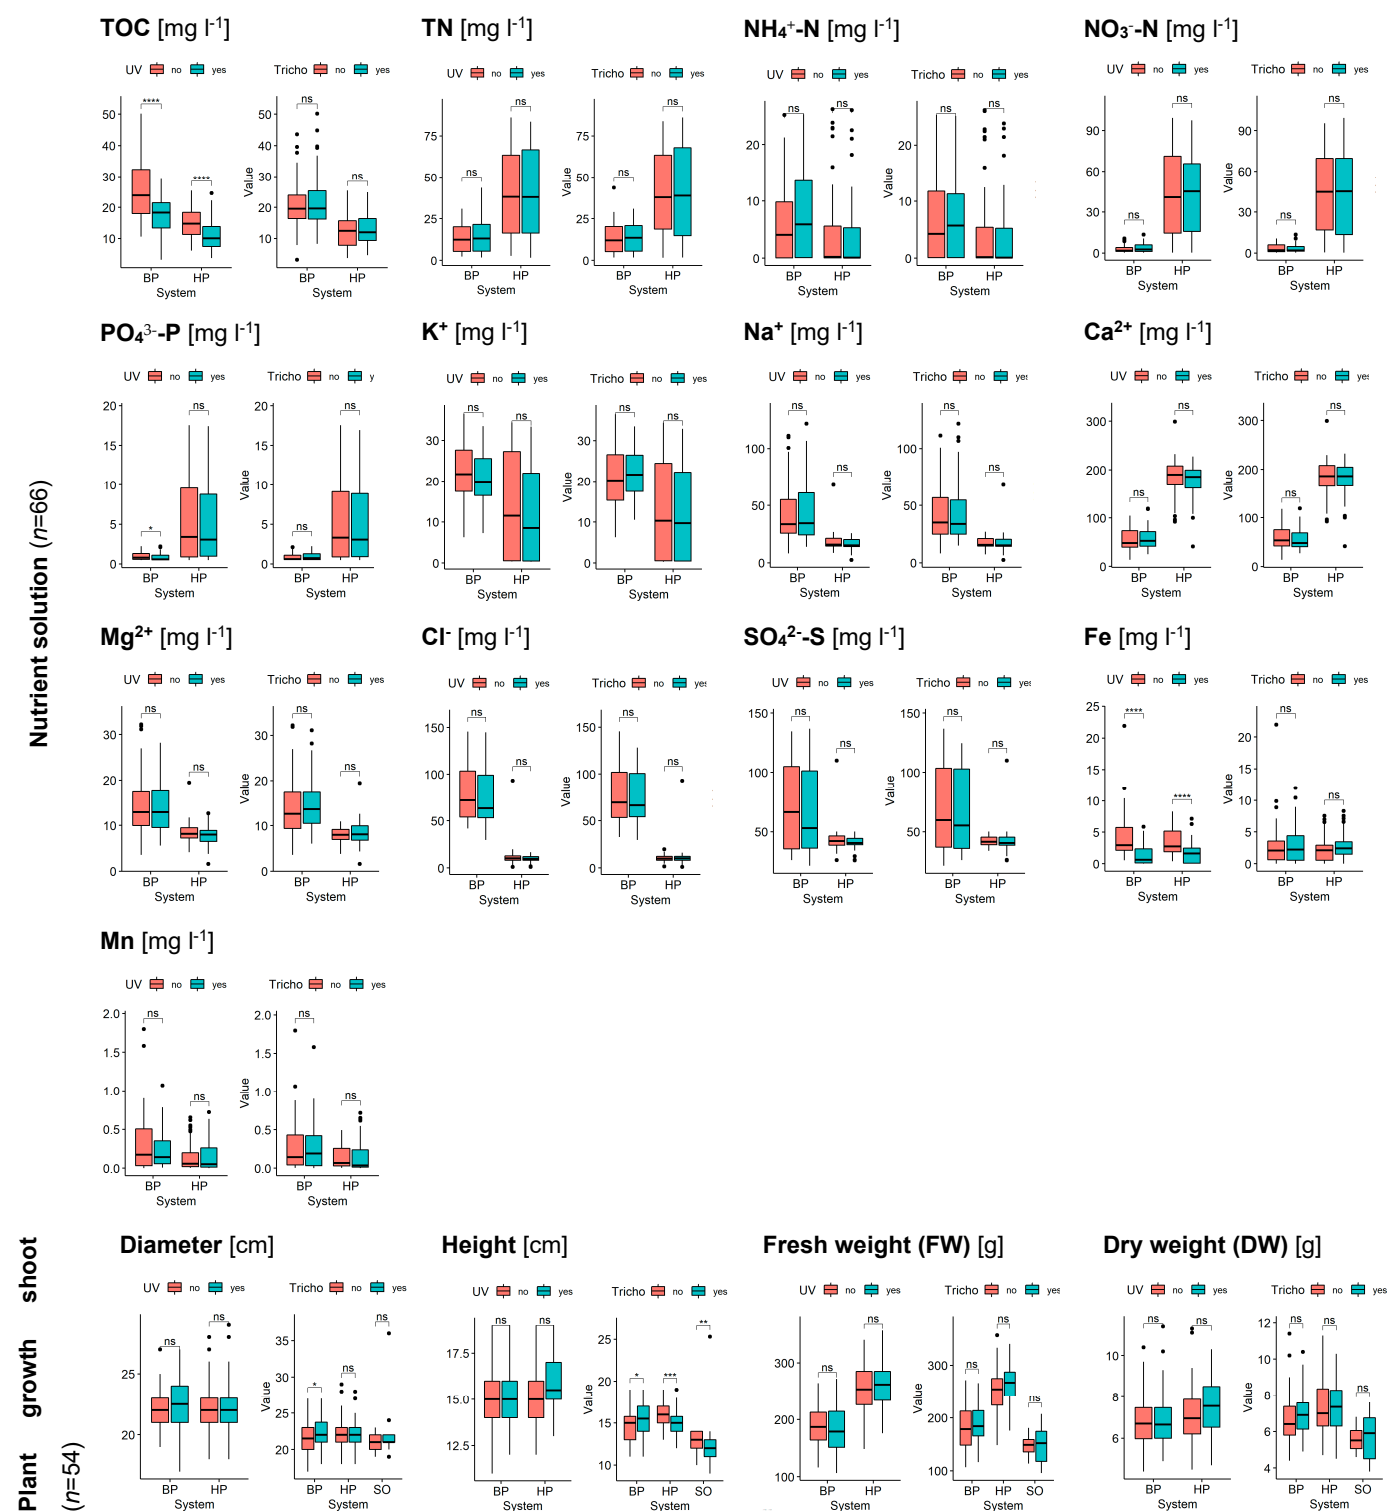

Growth indicator (n=48)

## Dry matter [%]

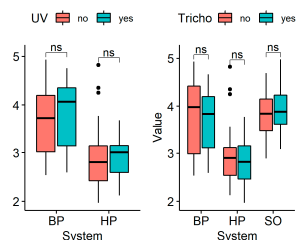

## DW:FW ratio [-]

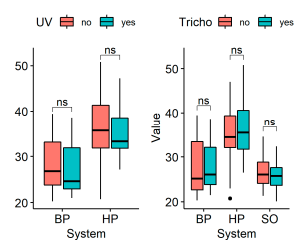

## Yield per system [kg]

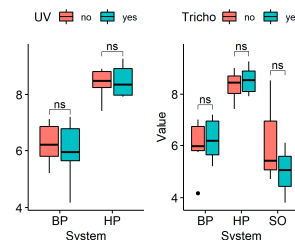

## Nitrogen balance index [-]

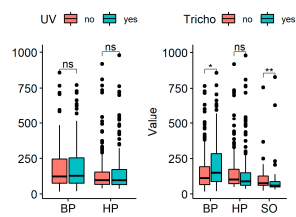Chlorophyll [ $\mu\text{g cm}^{-2}$ ]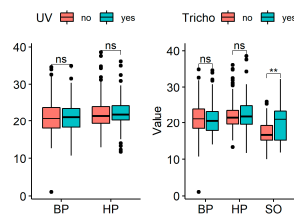Flavonoid [ $\mu\text{g cm}^{-2}$ ]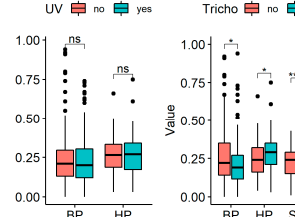

## Shelf-life (% remaining)

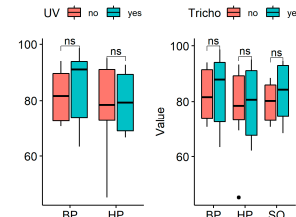

Plant growth root (n=54)

## Root length [cm]

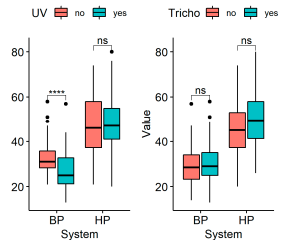

## Fresh weight [g]

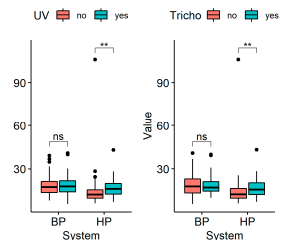

## Dry weight [g]

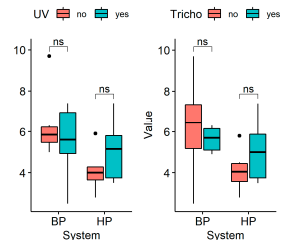

## Dry matter [%]

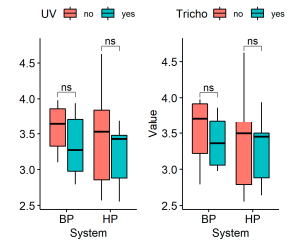

## DW:FW ratio [-]

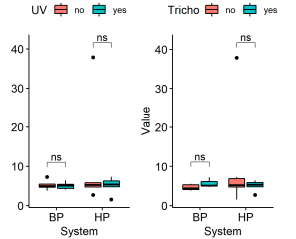

## Yield per system [kg]

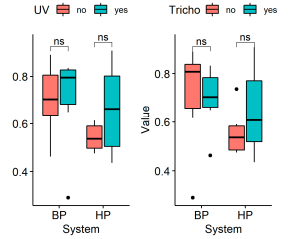

Plant sap (n=12)

## pH [-]

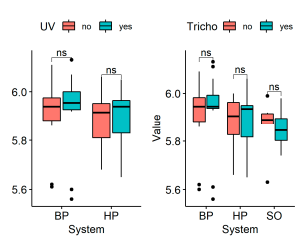EC [ $\mu\text{S cm}^{-1}$ ]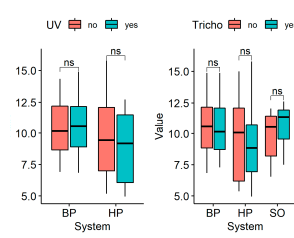

## Sugar [%]

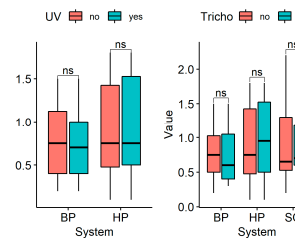TN [ $\text{mg kg}^{-1}$ ]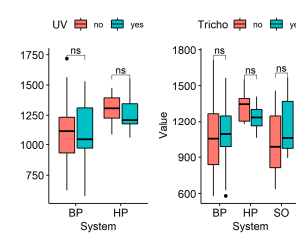

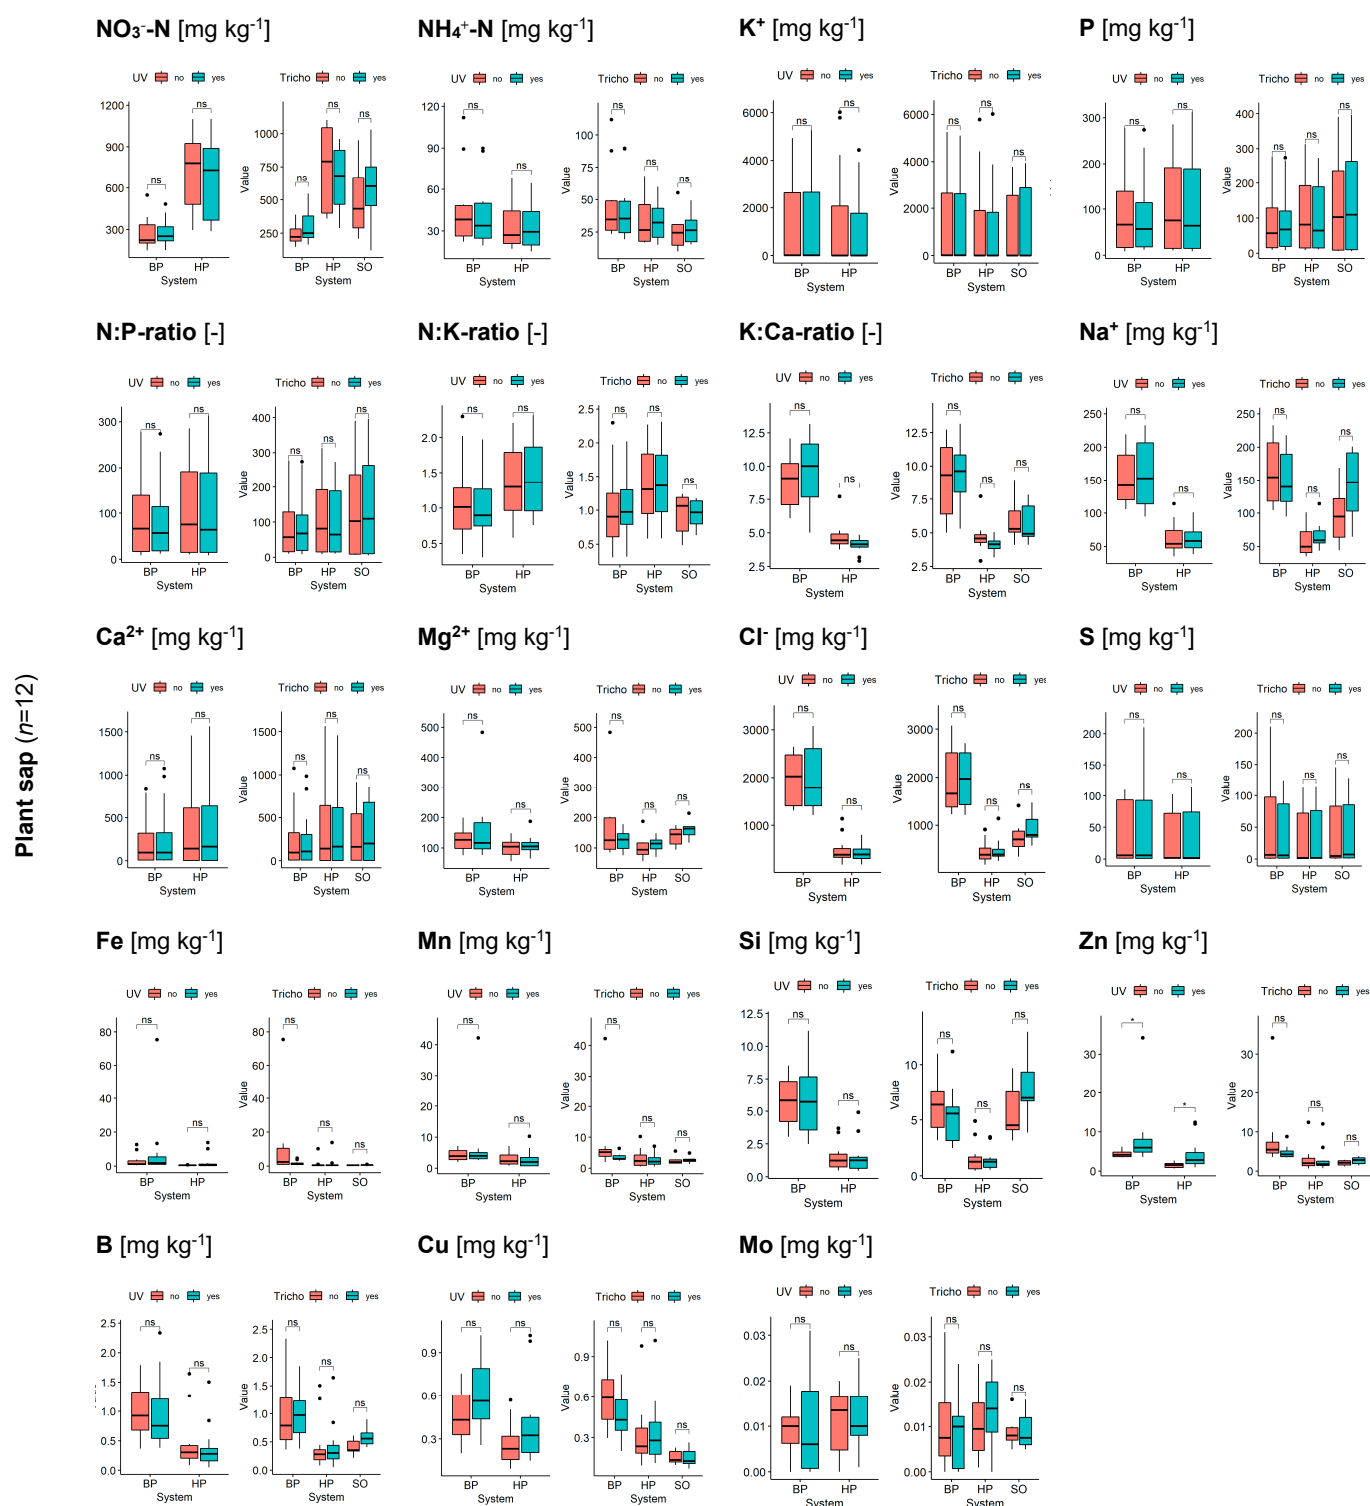

**Figure S4.** Comparison of water chemistry, plant growth and plant leaf sap regarding UV-C treatment and *T. atrobrunneum* application in bioponics (BP) and hydroponics (HP) based on Wilcoxon Signed Ranks Tests using a Bonferroni correction.

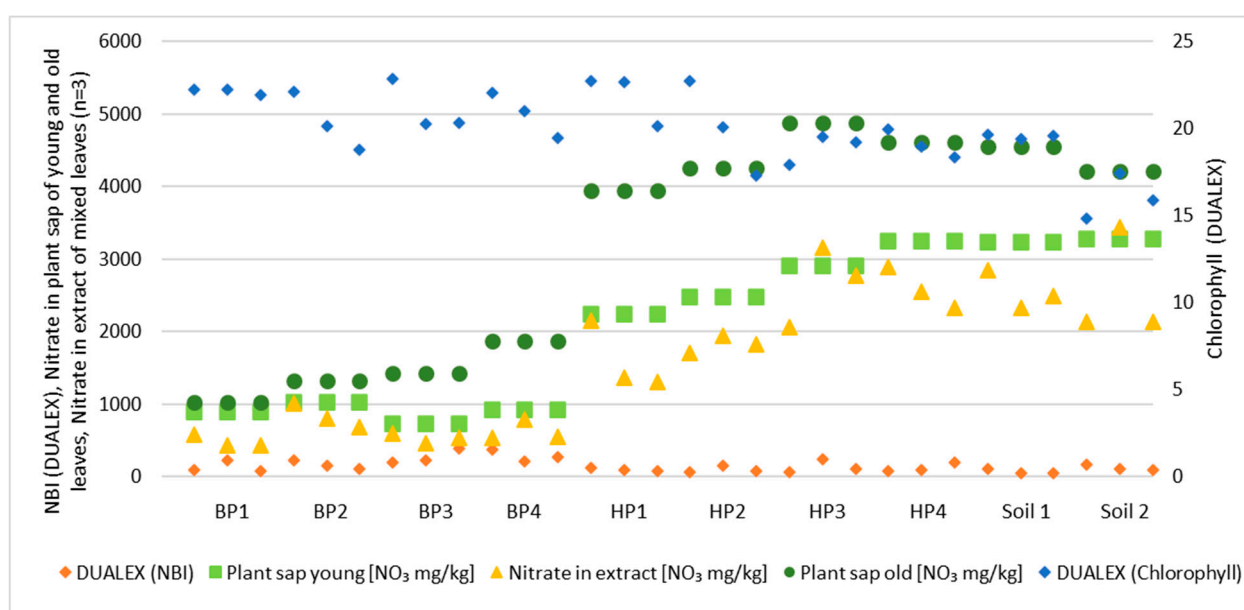

**Figure S5.** Comparison of two nitrate (in plant sap of young and old leaves; NovaCropControl, and in extract of mixed leaves; ZHAW), chlorophyll, and NBI measurement (Dualex) methods (Trial C).

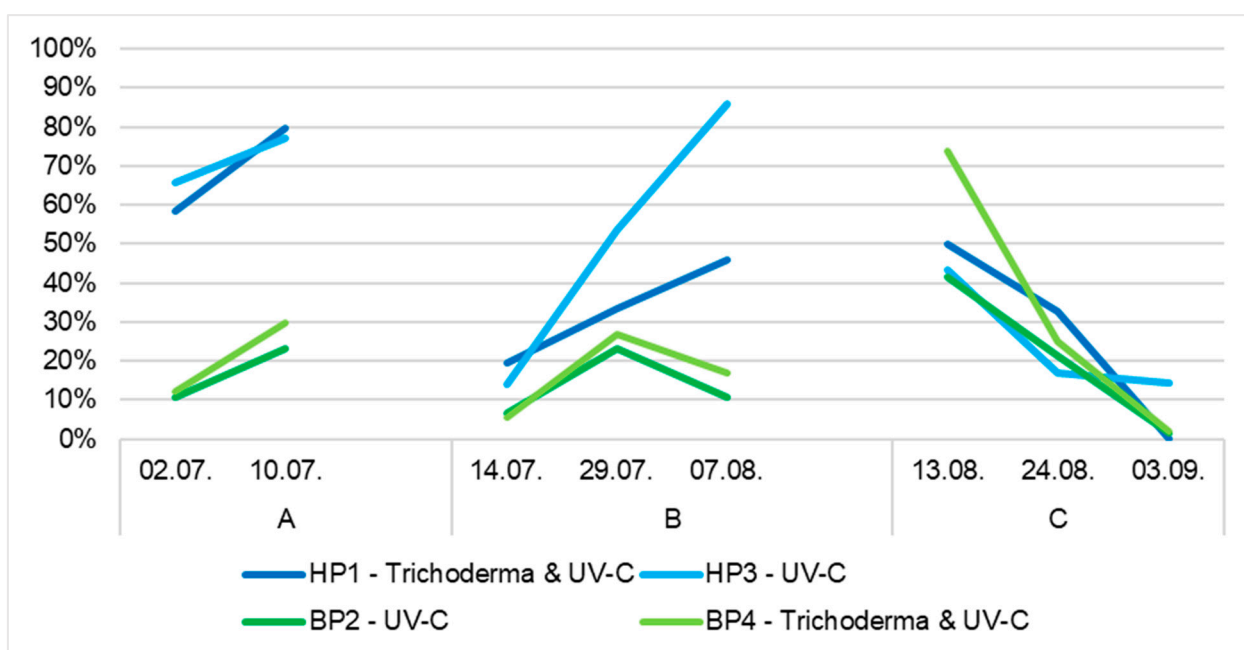

**Figure S6.** Transmission of the nutrient solution in bioponics (BP) and hydroponics (HP). Bioponic (green) usually had higher turbidity (lower transmission, higher extinction), with exception of Trial C.
